# Supplementary material
Source: publisher site journal article supplement (https://www.dovepress.com/article/162909)
Supplement: Supplementary file 1 [file get_supplementary_file.php%3Ff%3D162909.pdf]

## **Supplementary materials**

**Supplementary Table 1.** *International Classification of Diseases (ICD) codes and Anatomical Therapeutic Classification (ATC) codes used in the study.*

|                                       | <b>ICD-8</b>                                                                | <b>ICD-10</b>                                                                                           | <b>ATC code</b> |
|---------------------------------------|-----------------------------------------------------------------------------|---------------------------------------------------------------------------------------------------------|-----------------|
| Heart failure                         | 42709,<br>42710,<br>42711,<br>42719,<br>42899, 78249                        | I110, I130,<br>I132, I420,<br>I426, I427,<br>I428,<br>I429, I500,<br>I501, I502,<br>I503, I508,<br>I509 | N/A             |
| Coronary artery disease               | 410, 413, 411                                                               | I20-I21, I251,<br>I259                                                                                  | N/A             |
| Valvular heart disease                | 394-397                                                                     | I05-I08, I098,<br>I34-I37                                                                               |                 |
| Hypertension                          | 400-404                                                                     | I10-I15                                                                                                 | N/A             |
| Atrial fibrillation or atrial flutter | 42793, 42794                                                                | I48                                                                                                     | N/A             |
| Venous thromboembolism                | 450.99,<br>451.00                                                           | I26, I80.1-3                                                                                            |                 |
| Stroke                                | 430-434                                                                     | I60-I61, I63-<br>I64                                                                                    | N/A             |
| Intermittent claudication             | 44389-44399                                                                 | I739                                                                                                    | N/A             |
| Diabetes mellitus                     | 24900-24909<br>(excluding<br>24902),<br>25000-25009<br>(excluding<br>25002) | E10 (excluding<br>E102), E11<br>(excluding<br>E112), E14<br>(excluding<br>E142)                         | A10A, A10B      |
| Obesity                               | 277                                                                         | E65-E66                                                                                                 | N/A             |
| Cancer                                | 140-209                                                                     | C00-C96                                                                                                 | N/A             |
| Chronic pulmonary disease             | 490-493,<br>515-518                                                         | J40-J47, J60-<br>J67, J684,<br>J701, J703,<br>J841, J920,<br>J961, J982-<br>J983                        | N/A             |
| Chronic kidney disease                | 24902,<br>25002,<br>75310-<br>75319, 582-<br>584, 59009,<br>59320, 792      | E102, E112,<br>E142, N03,<br>N05, N110,<br>N14, N16,<br>N18-N19,<br>N269, Q611-<br>Q614                 | N/A             |
| Dementia                              | 29009-<br>29019, 29309                                                      | F00-F03, G30                                                                                            | N/A             |
| Depression                            | 29609,<br>29629,<br>29809, 30049                                            | F32-F33                                                                                                 | N06A            |

|                                                                              |                                                       |                                                                                     |                                                                             |
|------------------------------------------------------------------------------|-------------------------------------------------------|-------------------------------------------------------------------------------------|-----------------------------------------------------------------------------|
| Illicit drug abuse/alcohol abuse/smoking                                     | 303-304                                               | F10-F19                                                                             | N/A                                                                         |
| Peptic ulcer disease                                                         | 53091, 53098, 531-534                                 | K221, K25-K28                                                                       | N/A                                                                         |
| Gastroesophageal reflux disease                                              | 535                                                   | K21                                                                                 | N/A                                                                         |
| Anemia                                                                       | 280-281, 283-285                                      | D50-55, D59, D61-D64                                                                | N/A                                                                         |
| Liver disease                                                                | 070, 570-571, 573, 456                                | B15-B19, K71-K77                                                                    | N/A                                                                         |
| Alcoholism-related disorders                                                 | 980, 291.09-291.99, 303.09-303.99, 57109-57111, 57710 | G31.2, G62.1, G72.1, K29.2, K70, K86.0, Z72.1, E244, E529A, K852, L278A, Z502, Z714 | N/A                                                                         |
| Musculoskeletal disorders                                                    | 710-718                                               | M00-M99                                                                             |                                                                             |
| Inflammatory bowel disease                                                   | 56301, 56319                                          | K50-K51                                                                             |                                                                             |
| Gastroscopy*                                                                 |                                                       | KUJD                                                                                |                                                                             |
| Coronary artery bypass graft surgery*                                        |                                                       | KFNA-KFNE, KFNH20                                                                   |                                                                             |
| Percutaneous coronary intervention*                                          |                                                       | KFNG, KFNF                                                                          |                                                                             |
| <b>Exposure</b>                                                              |                                                       |                                                                                     |                                                                             |
| Histamine 2 receptor antagonists                                             |                                                       |                                                                                     | MA02BA (cimetidin, ranitidin, famotidin, nizatidin, ranitidinbismuthcitrat) |
| Proton pump inhibitors                                                       |                                                       |                                                                                     | MA02BC (omeprazol, pantoprazol, lansoprazol, rabeprazol, esomeprazol)       |
| <b>Comedication in past 90 days</b>                                          |                                                       |                                                                                     |                                                                             |
| Beta blockers                                                                | N/A                                                   | N/A                                                                                 | C07                                                                         |
| Angiotensin converting enzyme inhibitors or angiotensin receptor II blockers | N/A                                                   | N/A                                                                                 | C09A, C09B, C09C, C09D                                                      |
| Diuretics                                                                    | N/A                                                   | N/A                                                                                 | C03                                                                         |
| Statins                                                                      | N/A                                                   | N/A                                                                                 | C10AA, C10B                                                                 |
| NSAIDs                                                                       | N/A                                                   | N/A                                                                                 | M01A                                                                        |
| Antithrombotics                                                              | N/A                                                   | N/A                                                                                 | MB01A                                                                       |
| Benzodiazepines                                                              |                                                       |                                                                                     | MN05BA                                                                      |
| Opioids                                                                      |                                                       |                                                                                     | MN02A                                                                       |

**Causes of death**

Cardiovascular mortality    N/A                      I00-I99                      N/A

---

\*Codes in accordance with the NOMESCO classification.

**Supplementary Table 2.** Characteristics of heart failure patients registered in the Danish Heart Failure Registry (1 January 2003–1 February 2014), by exposure group. Data are numbers (%).

|                                                         | <b>Histamine H<sub>2</sub> receptor antagonist initiators</b> | <b>Proton pump inhibitor initiators</b> |
|---------------------------------------------------------|---------------------------------------------------------------|-----------------------------------------|
| <b>Number of patients</b>                               | 200 (3)                                                       | 7243 (97)                               |
| <b>Left ventricular ejection fraction</b>               |                                                               |                                         |
| <25%                                                    | 61 (31)                                                       | 2022 (28)                               |
| 25%-35%                                                 | 61 (31)                                                       | 2477 (34)                               |
| 36%-40%                                                 | 17 (9)                                                        | 966 (13)                                |
| 41%-49%                                                 | 10 (5)                                                        | 419 (6)                                 |
| ≥50%                                                    | 14 (7)                                                        | 553 (8)                                 |
| Missing                                                 | 37 (19)                                                       | 806 (11)                                |
| <b>New York Heart Association (NYHA) classification</b> |                                                               |                                         |
| NYHA Class I                                            | 6 (3)                                                         | 486 (7)                                 |
| NYHA Class II                                           | 52 (26)                                                       | 2557 (35)                               |
| NYHA Class III                                          | 49 (25)                                                       | 1571 (22)                               |
| NYHA Class IV                                           | 6 (3)                                                         | 170 (2)                                 |
| Missing                                                 | 87 (44)                                                       | 2459 (34)                               |
| <b>Alcohol intake</b>                                   |                                                               |                                         |
| Maximum 14 drinks for women and 21 for men per week     | 134 (67)                                                      | 5208 (72)                               |
| More than 14 drinks for women and 21 for men per week   | 9 (5)                                                         | 515 (7)                                 |
| Missing                                                 | 57 (29)                                                       | 1520 (21)                               |
| <b>Smoking habits</b>                                   |                                                               |                                         |
| Smoker                                                  | 54 (27)                                                       | 2147 (30)                               |
| Former smoker                                           | 64 (32)                                                       | 2483 (34)                               |
| Never smoker                                            | 40 (20)                                                       | 1511 (21)                               |
| Missing                                                 | 42 (21)                                                       | 1102 (15)                               |

**Supplementary Table 3.** Total number of redeemed prescriptions and cumulative duration of treatment within 2 years for patients initiating histamine H<sub>2</sub> receptor antagonists.

| <b>No. of prescriptions</b>             |           |
|-----------------------------------------|-----------|
| 1                                       | 1664 (50) |
| 2                                       | 525 (16)  |
| 3                                       | 242 (7)   |
| ≥4                                      | 865 (26)  |
| <b>Cumulative duration of H2RA use*</b> |           |
| <30 days                                | 964 (29)  |
| 30-49 days                              | 640 (19)  |
| 50-149 days                             | 837 (25)  |
| ≥150 days                               | 855 (26)  |

\*Sum of the duration of all prescriptions during 2 years after the first H2RA prescription. Duration of H2RA use was equal to the number of pills, assuming a daily dose of 300 mg.

Abbreviation: H2RA, histamine H<sub>2</sub> receptor antagonist

**Supplementary Table 4.** Overview of histamine H<sub>2</sub> receptor antagonist and proton pump inhibitor initiators and change of treatment during follow-up.

|                                  | <b>No PPI initiation during follow-up (%)</b> | <b>PPI initiation during follow-up (%)</b> | <b>Median time, days (25<sup>th</sup>-75<sup>th</sup> percentile) from H2RA initiation until PPI initiation</b> | <b>Patients (%) initiating PPI &lt; 1 year</b>  |
|----------------------------------|-----------------------------------------------|--------------------------------------------|-----------------------------------------------------------------------------------------------------------------|-------------------------------------------------|
| <b>H2RA initiators (n=3,296)</b> | 1694 (51)                                     | 1602 (49)                                  | 439 (84-1322)                                                                                                   | 746 (23)                                        |
|                                  | <b>No H2RA initiation during follow-up</b>    | <b>H2RA initiation during follow-up</b>    | <b>Median time, days (25<sup>th</sup>-75<sup>th</sup> percentile) from PPI initiation until H2RA initiation</b> | <b>Patients (%) initiating H2RA &lt; 1 year</b> |
| <b>PPI initiators (n=42,902)</b> | 41,955 (98)                                   | 947 (2)                                    | 302 (89-742)                                                                                                    | 525 (1)                                         |

Abbreviations: H2RA, histamine H<sub>2</sub> receptor antagonists; PPI, proton pump inhibitor

**Supplementary Table 5.** Baseline characteristics of the two study cohorts, by change of treatment during follow-up. Values are numbers (%) unless otherwise stated.

|                                                                       | <b>Histamine H<sub>2</sub> receptor antagonist initiators</b> |                             | <b>Proton pump inhibitor initiators</b> |                              |
|-----------------------------------------------------------------------|---------------------------------------------------------------|-----------------------------|-----------------------------------------|------------------------------|
|                                                                       | <b>No PPI during follow-up</b>                                | <b>PPI during follow-up</b> | <b>No H2RA during follow-up</b>         | <b>H2RA during follow-up</b> |
| <b>Total study population</b>                                         | 1694 (51)                                                     | 1602 (49)                   | 41,955 (98)                             | 947 (2)                      |
| <b>Median age, years (25<sup>th</sup>-75<sup>th</sup> percentile)</b> | 78 (70-85)                                                    | 74 (66-81)                  | 78 (69-85)                              | 75 (67-82)                   |
| <b>Age groups</b>                                                     |                                                               |                             |                                         |                              |
| <60 years                                                             | 150 (9)                                                       | 245 (15)                    | 4299 (10)                               | 124 (13)                     |
| 60-69 years                                                           | 252 (15)                                                      | 307 (19)                    | 7061 (17)                               | 192 (20)                     |
| 70-79 years                                                           | 588 (35)                                                      | 591 (37)                    | 12,722 (30)                             | 335 (35)                     |
| 80+ years                                                             | 704 (42)                                                      | 459 (29)                    | 17,873 (43)                             | 296 (31)                     |
| <b>Index-year groups</b>                                              |                                                               |                             |                                         |                              |
| 1995–1999                                                             | 868 (51)                                                      | 690 (43)                    | 3679 (9)                                | 360 (38)                     |
| 2000–2004                                                             | 621 (37)                                                      | 686 (43)                    | 11,522 (27)                             | 399 (42)                     |
| 2005–2009                                                             | 178 (11)                                                      | 210 (13)                    | 14,895 (36)                             | 160 (17)                     |
| 2010–2014                                                             | 27 (2)                                                        | 16 (1)                      | 11,859 (28)                             | 28 (3)                       |
| <b>Female</b>                                                         | 816 (48)                                                      | 777 (49)                    | 19,246 (46)                             | 475 (50)                     |
| <b>Time from heart failure diagnosis to first prescription</b>        |                                                               |                             |                                         |                              |
| <b>Median, days (25<sup>th</sup>-75<sup>th</sup> percentile)</b>      | 266 (63-775)                                                  | 337 (90-832)                | 452 (62-1361)                           | 259 (44-782)                 |
| <3 months                                                             | 536 (32)                                                      | 397 (25)                    | 12,010 (29)                             | 309 (33)                     |
| ≥3-<6 months                                                          | 175 (10)                                                      | 177 (11)                    | 3162 (8)                                | 93 (10)                      |
| ≥6-<12 months                                                         | 254 (15)                                                      | 268 (17)                    | 4217 (10)                               | 138 (15)                     |
| ≥12-<18 months                                                        | 155 (9)                                                       | 173 (11)                    | 3064 (7)                                | 82 (9)                       |
| ≥18-<24 months                                                        | 126 (7)                                                       | 133 (8)                     | 2545 (6)                                | 75 (8)                       |
| ≥24-<30 months                                                        | 93 (5)                                                        | 102 (6)                     | 2255 (5)                                | 54 (6)                       |
| ≥30 months                                                            | 355 (21)                                                      | 352 (22)                    | 14,702 (35)                             | 196 (21)                     |
| <b>Heart failure risk factors and comorbidity</b>                     |                                                               |                             |                                         |                              |
| Coronary artery disease                                               | 814 (48)                                                      | 845 (53)                    | 22,574 (54)                             | 516 (54)                     |
| Valvular heart disease                                                | 199 (12)                                                      | 188 (12)                    | 6367 (15)                               | 132 (14)                     |
| Hypertension                                                          | 396 (23)                                                      | 458 (29)                    | 17,201 (41)                             | 288 (30)                     |
| Atrial fibrillation or atrial flutter                                 | 518 (31)                                                      | 412 (26)                    | 15,711 (37)                             | 255 (27)                     |
| Venous thromboembolism                                                | 71 (4)                                                        | 58 (4)                      | 1744 (4)                                | 39 (4)                       |
| Stroke                                                                | 196 (12)                                                      | 163 (10)                    | 6368 (15)                               | 93 (10)                      |
| Intermittent claudication                                             | 36 (2)                                                        | 38 (2)                      | 2064 (5)                                | 25 (3)                       |
| Diabetes mellitus                                                     | 288 (17)                                                      | 293 (18)                    | 9596 (23)                               | 165 (17)                     |
| Obesity                                                               | 106 (6)                                                       | 122 (8)                     | 3518 (8)                                | 70 (7)                       |
| Cancer within 1 year                                                  | 123 (7)                                                       | 74 (5)                      | 3543 (8)                                | 49 (5)                       |
| Chronic pulmonary disease                                             | 422 (25)                                                      | 400 (25)                    | 10,819 (23)                             | 221 (23)                     |
| Chronic kidney disease                                                | 83 (5)                                                        | 65 (4)                      | 4071 (10)                               | 61 (6)                       |
| Dementia                                                              | 52 (3)                                                        | 30 (2)                      | 1641 (4)                                | 11 (1)                       |
| Depression                                                            | 423 (25)                                                      | 411 (26)                    | 14,258 (34)                             | 267 (28)                     |
| Illicit drug abuse/alcohol abuse/smoking                              | 57 (3)                                                        | 74 (5)                      | 2557 (6)                                | 54 (6)                       |



|                                                                  |           |           |             |          |
|------------------------------------------------------------------|-----------|-----------|-------------|----------|
| Peptic ulcer disease                                             | 125 (7)   | 122 (8)   | 5133 (12)   | 141 (15) |
| Gastroesophageal reflux disease                                  | 38 (2)    | 57 (4)    | 1330 (3)    | 37 (4)   |
| Anemia                                                           | 186 (11)  | 125 (8)   | 7254 (17)   | 138 (15) |
| Liver disease                                                    | 36 (2)    | 32 (2)    | 1065 (3)    | 26 (3)   |
| Alcoholism-related disorders                                     | 37 (2)    | 54 (3)    | 1366 (3)    | 33 (3)   |
| Musculoskeletal disorders                                        | 565 (33)  | 603 (38)  | 19,165 (45) | 387 (41) |
| Inflammatory bowel disease                                       | 9 (1)     | 16 (1)    | 536 (1)     | 9 (1)    |
| <b>Cardiac surgery within past 90 days</b>                       |           |           |             |          |
| Coronary artery bypass grafting                                  | 88 (5)    | 89 (6)    | 917 (2)     | 30 (3)   |
| Percutaneous coronary intervention                               | 21 (1)    | 25 (2)    | 1351 (3)    | 26 (3)   |
| <b>Comedication within past 90 days</b>                          |           |           |             |          |
| Betablockers                                                     | 394 (23)  | 444 (28)  | 15,412 (37) | 272 (29) |
| ACEI/ARBs                                                        | 644 (38)  | 697 (44)  | 18,827 (45) | 386 (41) |
| Diuretics                                                        | 1264 (75) | 1115 (70) | 26,893 (64) | 618 (65) |
| Statins                                                          | 167 (10)  | 261 (16)  | 10,173 (24) | 151 (16) |
| NSAIDs                                                           | 288 (17)  | 314 (20)  | 7323 (17)   | 181 (19) |
| Antithrombotics                                                  | 775 (46)  | 789 (49)  | 23,415 (56) | 474 (50) |
| Benzodiazepines                                                  | 246 (15)  | 285 (18)  | 4377 (10)   | 145 (15) |
| Opioids                                                          | 333 (20)  | 299 (19)  | 9747 (23)   | 204 (22) |
| <b>Income</b>                                                    |           |           |             |          |
| Low                                                              | 865 (51)  | 726 (45)  | 9555 (23)   | 391 (41) |
| Intermediate                                                     | 326 (19)  | 361 (23)  | 10,615 (25) | 236 (25) |
| High                                                             | 250 (15)  | 254 (16)  | 10,880 (26) | 151 (16) |
| Very high                                                        | 250 (15)  | 258 (16)  | 10,864 (26) | 168 (18) |
| Unknown                                                          | 3 (0.2)   | 3 (0.2)   | 41 (0.1)    | 1 (0.1)  |
| <b>Employment</b>                                                |           |           |             |          |
| Employed                                                         | 163 (10)  | 180 (11)  | 4359 (10)   | 109 (12) |
| Early retirement, receiving sickness/incapacity/early retirement | 13 (1)    | 28 (2)    | 540 (1)     | 14 (2)   |
| Unemployed                                                       | 173 (10)  | 267 (17)  | 4697 (11)   | 155 (16) |
| State pensioner                                                  | 1343 (79) | 1225 (70) | 32,284 (77) | 688 (71) |
| Unknown                                                          | 2 (0.1)   | 2 (0.1)   | 75 (0.2)    | 1 (0.1)  |

Abbreviations: ACEI/ARBs, angiotensin-converting enzyme inhibitors/angiotensin receptor II blockers; H2RA, histamine H<sub>2</sub> receptor antagonists; NSAIDs, nonsteroidal anti-inflammatory drugs; PPI, proton pump inhibitor

**Supplementary Table 6.** One-year all-cause mortality in subgroups of heart failure patients, comparing new users of histamine H<sub>2</sub> receptor antagonists and new users of proton pump inhibitors.

|                                             | <b>No. Events</b> | <b>Mortality risk in the H2RA group, % (95% CI)</b> | <b>Adjusted HR (95% CI)*</b> |
|---------------------------------------------|-------------------|-----------------------------------------------------|------------------------------|
| <b>Comorbidity</b>                          |                   |                                                     |                              |
| Valvular heart disease                      | 2250              | 25 (21-29)                                          | 0.79 (0.63-0.98)             |
| No valvular heart disease                   | 11,783            | 26 (24-27)                                          | 0.80 (0.74-0.87)             |
| Hypertension                                | 5320              | 23 (20-26)                                          | 0.76 (0.65-0.88)             |
| No hypertension                             | 8713              | 27 (25-28)                                          | 0.81 (0.75-0.88)             |
| Atrial fibrillation or atrial flutter       | 5596              | 27 (24-30)                                          | 0.80 (0.70-0.91)             |
| No atrial fibrillation or atrial flutter    | 8437              | 25 (23-27)                                          | 0.80 (0.73-0.87)             |
| Venous thromboembolism                      | 654               | 26 (20-35)                                          | 0.74 (0.51-1.06)             |
| No venous thromboembolism                   | 13,379            | 26 (24-27)                                          | 0.80 (0.74-0.87)             |
| Stroke                                      | 2506              | 33 (28-38)                                          | 0.87 (0.72-1.06)             |
| No stroke                                   | 11,527            | 25 (23-26)                                          | 0.79 (0.73-0.85)             |
| Intermittent claudication                   | 734               | 22 (14-33)                                          | 0.64 (0.38-1.08)             |
| No intermittent claudication                | 13,299            | 26 (24-27)                                          | 0.80 (0.75-0.87)             |
| Diabetes mellitus                           | 3207              | 24 (21-28)                                          | 0.71 (0.60-0.85)             |
| No diabetes mellitus                        | 10,826            | 26 (24-28)                                          | 0.82 (0.75-0.89)             |
| Obesity                                     | 924               | 17 (12-22)                                          | 0.62 (0.44-0.88)             |
| No obesity                                  | 13,109            | 26 (25-28)                                          | 0.81 (0.75-0.87)             |
| Cancer within 1 year                        | 3847              | 41 (36-45)                                          | 0.80 (0.65-0.98)             |
| No cancer within 1 year                     | 10,186            | 23 (22-25)                                          | 0.81 (0.75-0.87)             |
| Chronic pulmonary disease                   | 4116              | 27 (24-31)                                          | 0.71 (0.61-0.81)             |
| No chronic pulmonary disease                | 9917              | 25 (23-27)                                          | 0.84 (0.77-0.92)             |
| Chronic kidney disease                      | 1764              | 39 (31-47)                                          | 0.89 (0.68-1.18)             |
| No chronic kidney disease                   | 12,269            | 25 (24-27)                                          | 0.79 (0.74-0.86)             |
| Dementia                                    | 817               | 38 (28-49)                                          | 0.71 (0.48-1.05)             |
| No dementia                                 | 13,216            | 25 (24-27)                                          | 0.80 (0.74-0.86)             |
| Depression                                  | 5081              | 27 (24-30)                                          | 0.76 (0.66-0.87)             |
| No depression                               | 8952              | 25 (24-27)                                          | 0.82 (0.75-0.89)             |
| Illicit drug abuse/alcohol abuse/smoking    | 735               | 26 (19-34)                                          | 0.96 (0.66-1.39)             |
| No illicit drug abuse/alcohol abuse/smoking | 13,298            | 26 (24-27)                                          | 0.79 (0.74-0.86)             |
| Peptic ulcer disease                        | 1762              | 28 (22-34)                                          | 0.72 (0.55-0.92)             |
| No peptic ulcer disease                     | 12,271            | 25 (24-27)                                          | 0.81 (0.75-0.87)             |
| Gastroesophageal reflux disease             | 355               | 23 (16-33)                                          | 0.91 (0.58-1.44)             |
| No gastroesophageal reflux disease          | 13,678            | 26 (24-27)                                          | 0.80 (0.74-0.86)             |
| Anemia                                      | 3044              | 40 (34-45)                                          | 0.94 (0.77-1.14)             |
| No anemia                                   | 10,989            | 24 (23-26)                                          | 0.79 (0.73-0.85)             |
| Liver disease                               | 369               | 29 (20-42)                                          | 0.95 (0.58-1.54)             |
| No liver disease                            | 13,644            | 26 (24-27)                                          | 0.80 (0.74-0.86)             |
| Alcoholism-related disorders                | 440               | 30 (21-40)                                          | 1.07 (0.70-1.63)             |
| No alcoholism-related disorders             | 13,593            | 25 (24-27)                                          | 0.79 (0.74-0.85)             |
| Musculoskeletal disorders                   | 6095              | 27 (24-30)                                          | 0.87 (0.77-0.98)             |
| No musculoskeletal disorders                | 7938              | 25 (23-27)                                          | 0.76 (0.69-0.83)             |

|                                                                     |        |            |                  |
|---------------------------------------------------------------------|--------|------------|------------------|
| Inflammatory bowel disease                                          | 173    | 20 (9-42)  | 0.53 (0.19-1.48) |
| No inflammatory bowel disease                                       | 13,860 | 26 (24-27) | 0.80 (0.74-0.86) |
| <b>Cardiac surgery</b>                                              |        |            |                  |
| Coronary artery bypass grafting                                     | 90     | 6 (3-11)   | 0.63 (0.31-1.30) |
| No coronary artery bypass grafting                                  | 13,943 | 27 (25-28) | 0.80 (0.74-0.86) |
| Percutaneous coronary intervention                                  | 217    | 13 (6-27)  | 1.17 (0.48-2.82) |
| No percutaneous coronary intervention                               | 13,816 | 26 (24-27) | 0.80 (0.74-0.86) |
| <b>Comedication</b>                                                 |        |            |                  |
| Diuretics                                                           | 10,003 | 29 (27-30) | 0.82 (0.75-0.89) |
| No diuretics                                                        | 4030   | 18 (16-21) | 0.73 (0.62-0.86) |
| Statins                                                             | 2251   | 11 (8-14)  | 0.69 (0.51-0.94) |
| No statins                                                          | 11,782 | 28 (26-29) | 0.81 (0.75-0.87) |
| NSAIDs                                                              | 2442   | 28 (25-32) | 0.82 (0.69-0.96) |
| No NSAIDs                                                           | 11,591 | 25 (23-27) | 0.79 (0.73-0.86) |
| Antithrombotics                                                     | 7474   | 24 (22-26) | 0.80 (0.72-0.90) |
| No antithrombotics                                                  | 6559   | 27 (25-29) | 0.79 (0.72-0.88) |
| Benzodiazepines                                                     | 1706   | 25 (33-36) | 0.72 (0.60-0.87) |
| No benzodiazepines                                                  | 12,327 | 26 (24-27) | 0.82 (0.76-0.89) |
| Opioids                                                             | 4170   | 34 (31-38) | 0.82 (0.71-0.95) |
| No opioids                                                          | 9863   | 24 (22-25) | 0.79 (0.73-0.86) |
| <b>Income</b>                                                       |        |            |                  |
| Low                                                                 | 3720   | 27 (25-30) | 0.78 (0.70-0.86) |
| Intermediate                                                        | 3881   | 28 (25-31) | 0.84 (0.72-0.98) |
| High                                                                | 3572   | 23 (20-27) | 0.75 (0.62-0.92) |
| Very high                                                           | 2854   | 20 (17-24) | 0.83 (0.67-1.02) |
| <b>Employment</b>                                                   |        |            |                  |
| Employed                                                            | 702    | 15 (12-19) | 0.66 (0.49-0.90) |
| Early retirement, receiving<br>sickness/incapacity/early retirement | 74     | 10 (4-24)  | 0.71 (0.23-2.22) |
| Unemployed                                                          | 941    | 13 (10-17) | 0.73 (0.55-0.97) |
| State pensioner                                                     | 12,304 | 30 (28-31) | 0.81 (0.75-0.88) |

\*Adjusted by age group, sex, index-year categories, time from heart failure diagnosis until first prescription for PPI or H2RA, coronary artery disease, valvular heart disease, hypertension, atrial fibrillation or atrial flutter, venous thromboembolism, stroke, intermittent claudication, diabetes mellitus, obesity, cancer within 1 year, chronic pulmonary disease, chronic kidney disease, dementia, depression, illicit drug abuse/alcohol abuse/smoking, peptic ulcer disease, gastroesophageal reflux disease, anemia, chronic liver disease, alcoholism-related disorders, musculoskeletal disorders, inflammatory bowel disease, cardiac surgery within past 90 days (coronary artery bypass graft surgery and percutaneous coronary intervention), comedication within past 90 days (beta blockers, angiotensin-converting enzyme inhibitors or angiotensin receptor II blockers, diuretics, statins, NSAIDs, antithrombotics, benzodiazepines, and opioids), income, and employment (except the stratifying variable).  
Abbreviations: CI, confidence interval; HR, hazard ratio

**Supplementary Table 7.** Sensitivity analyses. Association between histamine H<sub>2</sub> receptor antagonist initiation and 1-year mortality.

|                                                                                                                                                                                            | No. events | Mortality risk,<br>% (95% CI) | Unadjusted HR<br>(95% CI) | Adjusted HR<br>(95% CI)*      |
|--------------------------------------------------------------------------------------------------------------------------------------------------------------------------------------------|------------|-------------------------------|---------------------------|-------------------------------|
| <b>Danish Heart Failure Registry Cohort</b>                                                                                                                                                |            |                               |                           |                               |
| PPI                                                                                                                                                                                        | 1584       | 22 (21-23)                    | Reference                 | Reference                     |
| H2RA                                                                                                                                                                                       | 21         | 11 (7-16)                     | 0.45 (0.29-0.69)          | 0.84 (0.55-1.31) <sup>†</sup> |
| <b>Additional adjustment for gastroscopy within past 6 months</b>                                                                                                                          |            |                               |                           |                               |
| PPI                                                                                                                                                                                        | 12,996     | 31 (30-31)                    | Reference                 | Reference                     |
| H2RA                                                                                                                                                                                       | 699        | 25 (23-26)                    | 0.76 (0.71-0.82)          | 0.79 (0.73-0.85)              |
| <b>Patients assigned to exposure groups after the first year following hospitalization for heart failure<sup>‡</sup></b>                                                                   |            |                               |                           |                               |
| PPI                                                                                                                                                                                        | 1027       | 19 (18-20)                    | Reference                 | Reference                     |
| H2RA                                                                                                                                                                                       | 85         | 17 (15-19)                    | 0.87 (0.75-1.01)          | 0.81 (0.69-0.94)              |
| PPI+H2RA                                                                                                                                                                                   | 38         | 23 (19-27)                    | 1.25 (1.02-1.54)          | 1.16 (0.94-1.43)              |
| <b>Patients assigned to exposure groups after the first year following hospitalization for heart failure and those with only one prescription of H2RA or PPI were excluded<sup>‡</sup></b> |            |                               |                           |                               |
| PPI                                                                                                                                                                                        | 647        | 21 (20-21)                    | Reference                 | Reference                     |
| H2RA                                                                                                                                                                                       | 44         | 18 (15-22)                    | 0.89 (0.72-1.09)          | 0.79 (0.63-0.98)              |
| <b>Analyses restricted to second prescriptions</b>                                                                                                                                         |            |                               |                           |                               |
| PPI                                                                                                                                                                                        | 7071       | 32 (31-32)                    | Reference                 | Reference                     |
| H2RA                                                                                                                                                                                       | 334        | 26 (24-29)                    | 0.80 (0.72-0.89)          | 0.82 (0.73-0.92)              |

\*Adjusted by age group, sex, index-year categories, time from heart failure diagnosis until first prescription for PPI or H2RA, coronary artery disease, valvular heart disease, hypertension, atrial fibrillation or atrial flutter, venous thromboembolism, stroke, intermittent claudication, diabetes mellitus, obesity, cancer within 1 year, chronic pulmonary disease, chronic kidney disease, dementia, depression, illicit drug abuse/alcohol abuse/smoking, peptic ulcer disease, gastroesophageal reflux disease, anemia, chronic liver disease, alcoholism-related disorders, musculoskeletal disorders, inflammatory bowel disease, cardiac surgery within past 90 days (coronary artery bypass graft surgery and percutaneous coronary intervention), comedication within past 90 days (beta blockers, angiotensin-converting enzyme inhibitors or angiotensin receptor II blockers, diuretics, statins, NSAIDs, antithrombotics, benzodiazepines, and opioids), income, and employment.

<sup>†</sup>Additional adjustment for alcohol abuse and smoking yielded an adjusted HR of 0.83 (95% CI, 0.48-1.45)

<sup>‡</sup>For this analysis, follow-up was started one year after the heart failure admission date. Therefore the analysis was not adjusted for time since heart failure diagnosis.

Abbreviations: CI, confidence interval; HR, hazard ratio; H2RA, histamine H<sub>2</sub> receptor antagonist; PPI, proton pump inhibitor

**Supplementary Table 8.** All-cause mortality in the second year after the heart failure admission date, by number of H2RA prescriptions during the first year.

| <b>No. of H2RA prescriptions</b> | <b>No. events</b> | <b>Mortality risk, %<br/>(95% CI)</b> | <b>Unadjusted HR<br/>(95% CI)</b> | <b>Adjusted HR<br/>(95% CI)*</b> |
|----------------------------------|-------------------|---------------------------------------|-----------------------------------|----------------------------------|
| 0                                | 9185              | 19 (18-20)                            | Reference                         | Reference                        |
| 1                                | 531               | 15 (13-18)                            | 0.79 (0.64-0.97)                  | 0.82 (0.67-1.01)                 |
| 2                                | 161               | 14 (10-20)                            | 0.74 (0.51-1.08)                  | 0.71 (0.48-1.04)                 |
| 3                                | 88                | 21 (14-31)                            | 1.13 (0.73-1.76)                  | 0.95 (0.61-1.48)                 |
| ≥4                               | 222               | 20 (16-26)                            | 1.09 (0.83-1.45)                  | 0.85 (0.64-1.13)                 |

\*Adjusted by age group, sex, index-year categories, coronary artery disease, valvular heart disease, hypertension, atrial fibrillation or atrial flutter, venous thromboembolism, stroke, intermittent claudication, diabetes mellitus, obesity, cancer within 1 year, chronic pulmonary disease, chronic kidney disease, dementia, depression, illicit drug abuse/alcohol abuse/smoking, peptic ulcer disease, gastroesophageal reflux disease, anemia, chronic liver disease, alcoholism-related disorders, musculoskeletal disorders, inflammatory bowel disease, cardiac surgery within past 90 days (coronary artery bypass graft surgery and percutaneous coronary intervention), comedication within past 90 days (beta blockers, angiotensin-converting enzyme inhibitors or angiotensin receptor II blockers, diuretics, statins, NSAIDs, antithrombotics, benzodiazepines, and opioids), income, and employment.

Abbreviations: CI, confidence interval; HR, hazard ratio; H2RA, histamine H<sub>2</sub> receptor antagonist

**Supplementary Table 9.** Association between histamine H<sub>2</sub> receptor antagonists and 1-year mortality, by time periods and time since heart failure admission date.

|                                                | No. events | Mortality risk, % (95% CI) | Unadjusted HR (95% CI) | Adjusted HR (95% CI)* |
|------------------------------------------------|------------|----------------------------|------------------------|-----------------------|
| <b>Time period</b>                             |            |                            |                        |                       |
| <b>1995–1999</b>                               |            |                            |                        |                       |
| PPI                                            | 1419       | 35 (34-37)                 | Reference              | Reference             |
| H2RA                                           | 461        | 30 (27-32)                 | 0.80 (0.72-0.89)       | 0.84 (0.76-0.94)      |
| <b>2000–2004</b>                               |            |                            |                        |                       |
| PPI                                            | 3996       | 34 (33-34)                 | Reference              | Reference             |
| H2RA                                           | 294        | 23 (20-25)                 | 0.62 (0.55-0.70)       | 0.74 (0.65-0.83)      |
| <b>2005–2009</b>                               |            |                            |                        |                       |
| PPI                                            | 4507       | 30 (29-31)                 | Reference              | Reference             |
| H2RA                                           | 73         | 19 (15-23)                 | 0.59 (0.47-0.74)       | 0.73 (0.58-0.92)      |
| <b>2010–2014</b>                               |            |                            |                        |                       |
| PPI                                            | 3268       | 28 (27-29)                 | Reference              | Reference             |
| H2RA                                           | 15         | 35 (23-51)                 | 1.30 (0.78-2.15)       | 1.46 (0.87-2.43)      |
| <b>Time since heart failure admission date</b> |            |                            |                        |                       |
| <b>&lt;3 months</b>                            |            |                            |                        |                       |
| PPI                                            | 3877       | 32 (31-32)                 | Reference              | Reference             |
| H2RA                                           | 274        | 29 (27-32)                 | 0.91 (0.80-1.03)       | 0.89 (0.77-1.01)      |
| <b>≥3-&lt;6 months</b>                         |            |                            |                        |                       |
| PPI                                            | 1044       | 32 (31-34)                 | Reference              | Reference             |
| H2RA                                           | 90         | 26 (21-31)                 | 0.76 (0.61-0.94)       | 0.76 (0.60-0.95)      |
| <b>≥6-&lt;12 months</b>                        |            |                            |                        |                       |
| PPI                                            | 1375       | 32 (30-33)                 | Reference              | Reference             |
| H2RA                                           | 128        | 25 (21-28)                 | 0.73 (0.61-0.87)       | 0.73 (0.60-0.88)      |
| <b>≥12-&lt;18 months</b>                       |            |                            |                        |                       |
| PPI                                            | 943        | 30 (28-32)                 | Reference              | Reference             |
| H2RA                                           | 75         | 23 (19-28)                 | 0.72 (0.57-0.91)       | 0.64 (0.50-0.82)      |
| <b>≥18-&lt;24 months</b>                       |            |                            |                        |                       |
| PPI                                            | 775        | 30 (28-31)                 | Reference              | Reference             |
| H2RA                                           | 62         | 24 (19-30)                 | 0.77 (0.60-1.00)       | 0.79 (0.60-1.04)      |
| <b>≥24-&lt;30 months</b>                       |            |                            |                        |                       |
| PPI                                            | 653        | 28 (27-30)                 | Reference              | Reference             |
| H2RA                                           | 48         | 25 (19-31)                 | 0.83 (0.62-1.12)       | 0.93 (0.68-1.27)      |
| <b>≥30 months</b>                              |            |                            |                        |                       |
| PPI                                            | 4523       | 30 (30-31)                 | Reference              | Reference             |
| H2RA                                           | 166        | 23 (21-27)                 | 0.73 (0.63-0.86)       | 0.79 (0.67-0.92)      |

\*Adjusted by age group, sex, index-year categories, time from heart failure diagnosis until first prescription for PPI or H2RA, coronary artery disease, valvular heart disease, hypertension, atrial fibrillation or atrial flutter, venous thromboembolism, stroke, intermittent claudication, diabetes mellitus, obesity, cancer within 1 year, chronic pulmonary disease, chronic kidney disease, dementia, depression, illicit drug abuse/alcohol abuse/smoking, peptic ulcer disease, gastroesophageal reflux disease, anemia, chronic liver disease, alcoholism-related disorders, musculoskeletal disorders, inflammatory bowel disease, cardiac surgery within past 90 days (coronary artery bypass graft surgery and percutaneous coronary intervention), comedication within past 90 days (beta blockers, angiotensin-converting enzyme inhibitors or angiotensin receptor II blockers, diuretics, statins, NSAIDs, antithrombotics, benzodiazepines, and opioids), income, and employment (except the stratifying variable).

Abbreviations: CI, confidence interval; HR, hazard ratio; H2RA, histamine H<sub>2</sub> receptor antagonist; PPI: proton pump inhibitor

**Supplementary Figure 1.** Flowchart of inclusion of study participants.

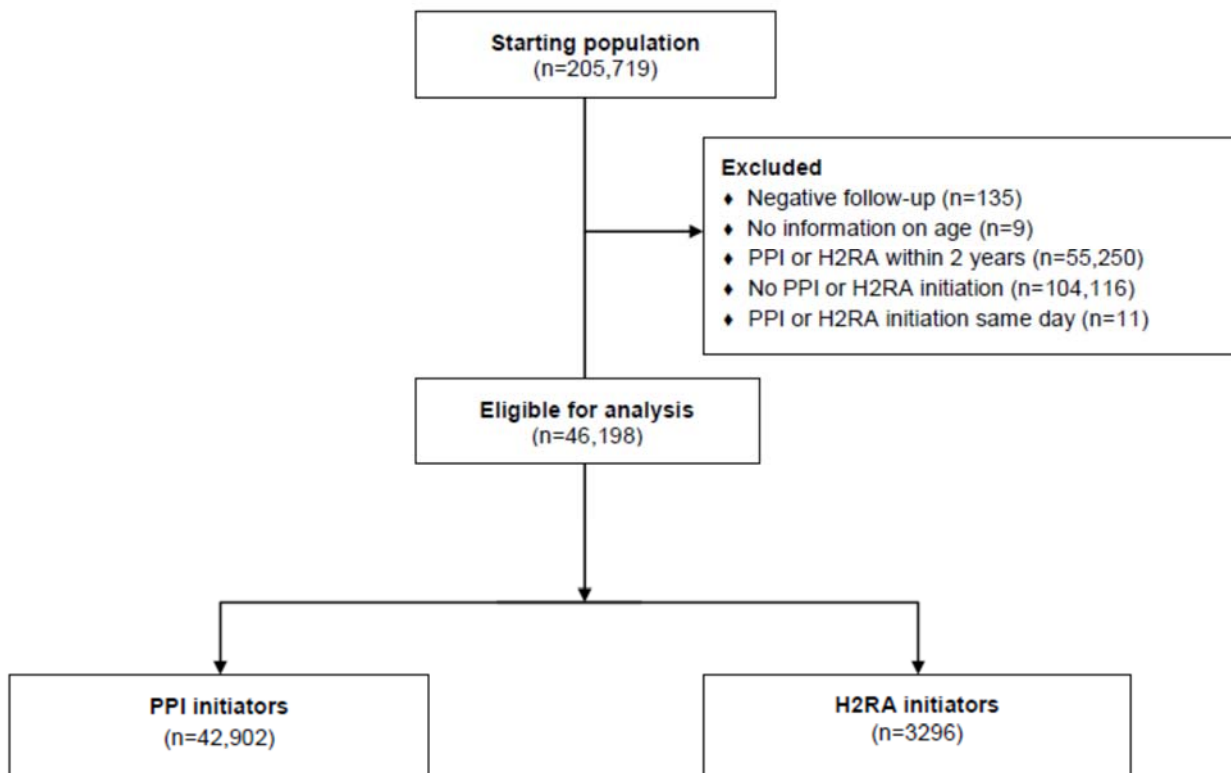

Abbreviations: H2RA, histamine H<sub>2</sub> receptor antagonist; PPI, proton pump inhibitor

**Supplementary Figure 2.** Kaplan-Meier survival curve for initiators of proton pump inhibitors and histamine H<sub>2</sub> receptor antagonists after propensity score matching.

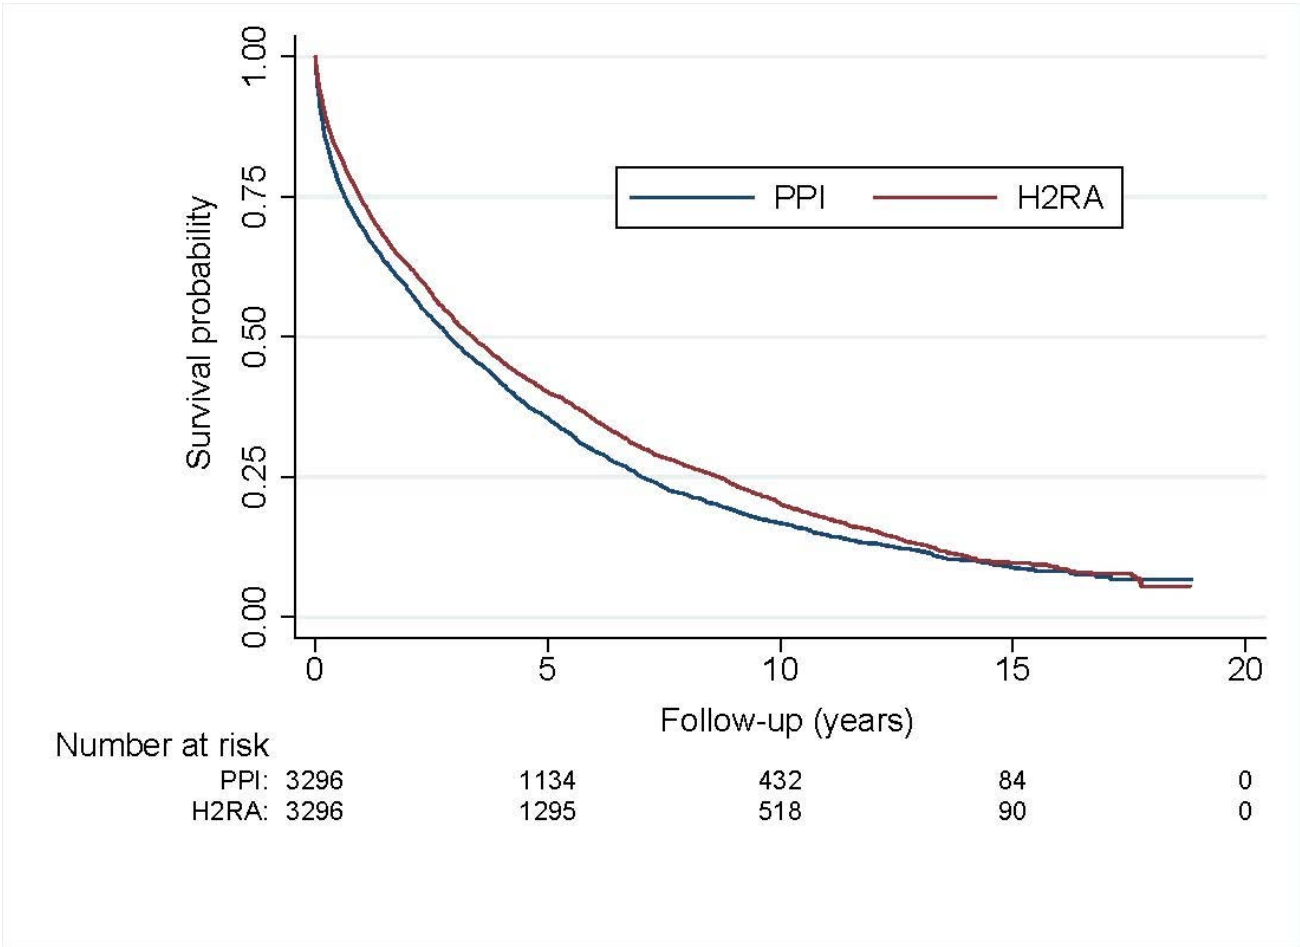

Abbreviations: H2RA, histamine H<sub>2</sub> receptor antagonist; PPI, proton pump inhibitor
